# Supplementary material for: Pure phase orthorhombic MgTi2O5 photocatalyst for H2 production
Source: Royal Society of Chemistry journal article supplement (doi:10.1039/c5ra20992g), 2015-01-01
Supplement: c5ra20992g1.pdf [file c5ra20992g1.pdf]

## Pure phase orthorhombic MgTi<sub>2</sub>O<sub>5</sub> photocatalyst for H<sub>2</sub> production

Ning Zhang, Kaifu Zhang, Wei Zhou, Baojiang Jiang, Kai Pan, Yang Qu\* and Guofeng Wang\*

### 1. Quantum efficiency calculations

The determination of the apparent quantum efficiency for hydrogen generation was performed using the same closed circulating system under illumination of a 300 W Xe lamp with bandpass filter (313 nm) system. The light intensity was measured using a Si photodiode (orea1 91105V). The total light intensities were 36.69 mW·s<sup>-1</sup> for 313 nm, 6.63 mW·s<sup>-1</sup> for 365 nm. The irradiation area was around 7 cm<sup>2</sup>. Apparent quantum efficiency (AQE) at different wavelengths was calculated by the following equation.

$$AQE = \frac{2 \times \text{the number of evolved } H_2 \text{ molecules}}{\text{the number of incident photons}} \times 100\%$$

### 2. Solar to hydrogen (STH) conversion efficiency calculations from solar simulator measurements.

The solar energy conversion was evaluated by using AM 1.5 solar simulator as the light source with MgTi<sub>2</sub>O<sub>5</sub> nanocrystals as the catalyst (20 mg catalyst in 80 mL water and 20 ml methanol). After 1h of illumination, the total incident power over the 7 cm<sup>2</sup> irradiation area was 1.21 W, so that the total input energy in 1 hours was

$$E_{\text{Solar}} = 4.36 \times 10^3 \text{ J.}$$

During the photocatalytic reaction, 94.72 μmol H<sub>2</sub> was detected by gas chromatography, which indicated that the energy generated by water splitting is E<sub>F</sub> = 22.57 J.

E<sub>F</sub> = 94.72 × 10<sup>-6</sup> × 6.02 × 10<sup>23</sup> × 2.46 × 1.609 × 10<sup>-19</sup>; 2.46 eV is the free energy of water splitting.

The “solar-to-hydrogen” conversion efficiency of MgTi<sub>2</sub>O<sub>5</sub> nanocrystals was determined to be:

$$STH = E_F / E_{\text{Solar}} = 0.517\%$$

Table S1. Control experiments to prepare pure phase  $\text{MgTi}_2\text{O}_5$

| Name  | $C_{\text{Mg}}$ (mol/L) | Molar Ratios |    | T(°C) | Production                |
|-------|-------------------------|--------------|----|-------|---------------------------|
|       |                         | Mg           | Ti |       |                           |
| PMT   | 0.0104                  | 1            | 1  | 17    | $\text{MgTi}_2\text{O}_5$ |
| MMT-1 | 0.0104                  | 1            | 2  | 17    | Mixed phase               |
| MMT-2 | 0.0104                  | 2            | 1  | 17    | Mixed phase               |
| MMT-3 | 0.0278                  | 1            | 1  | 17    | Mixed phase               |
| MMT-4 | 0.0278                  | 1            | 2  | 25    | Mixed phase               |

$C_{\text{Mg}}$  is the concentration of  $\text{Mg}^{2+}$  ions in solution. Mixed phase contains  $\text{MgTiO}_3$  and  $\text{MgTi}_2\text{O}_5$ .

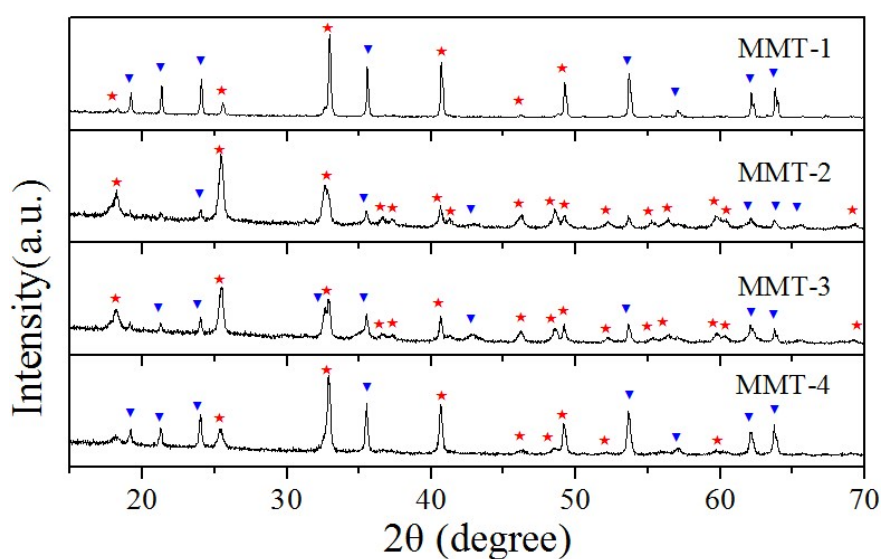

**Figure S1.** XRD patterns of mixed phase magnesium titanates (the red star is phase of  $\text{MgTi}_2\text{O}_5$  and the blue triangle is phase of  $\text{MgTiO}_3$ ).

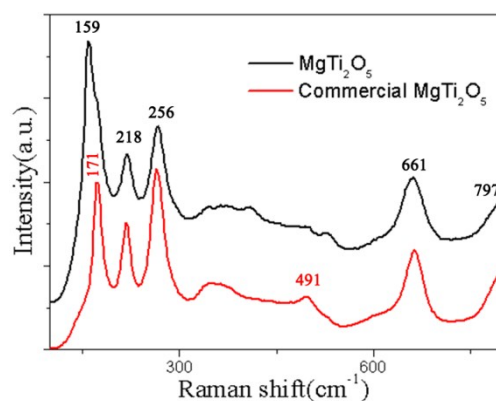

**Figure S2.** Raman spectra of  $\text{MgTi}_2\text{O}_5$  nanocrystals and commercial  $\text{MgTi}_2\text{O}_5$ .

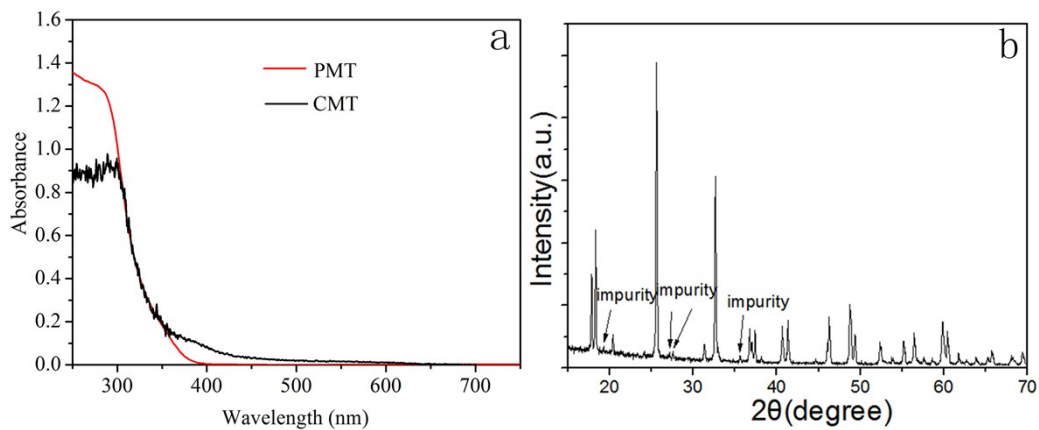

Figure S3. UV-vis absorption spectrum (a) of PMT and CMT, and XRD pattern of CMT (b).

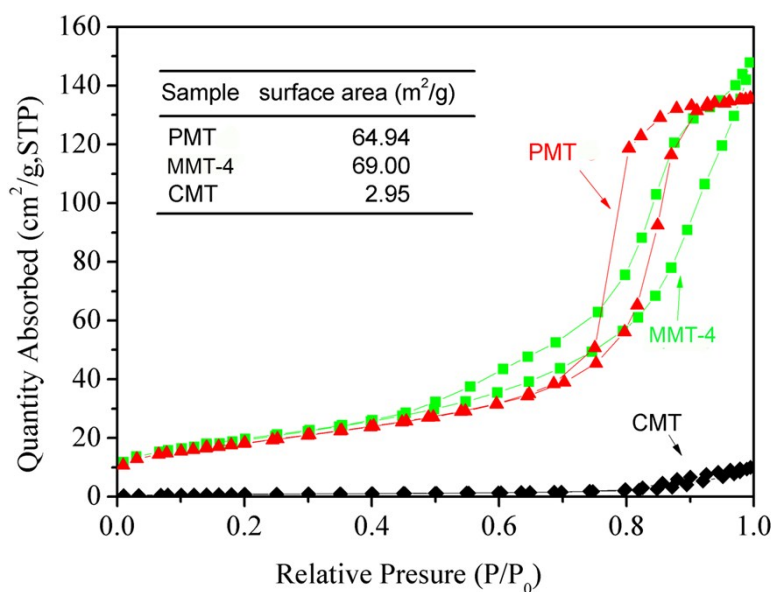

Figure S4. N<sub>2</sub> adsorption-desorption isotherm curves and pore size distribution (inset) of pure MgTi<sub>2</sub>O<sub>5</sub> nanocrystals, mixed phase MgTiO<sub>3</sub>/MgTi<sub>2</sub>O<sub>5</sub> and commercial MgTi<sub>2</sub>O<sub>5</sub>.

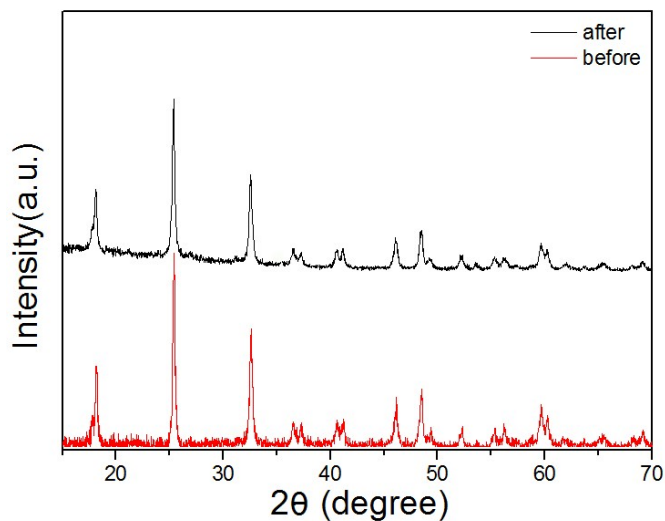

Figure S5. XRD patterns of PMT before and after five times cycles of H<sub>2</sub> production.
